# Supplementary material for: Enhanced Bioremediation of Aged Polycyclic Aromatic Hydrocarbons in Soil Using Immobilized Microbial Consortia Combined with Strengthening Remediation Strategies
Source: MDPI journal article supplement (doi:10.3390/ijerph20031766), 2023-01-18
Supplement: s1 [file s1]

## **Supporting Information**

### **Enhanced bioremediation of aged polycyclic aromatic hydrocarbons in soil using immobilized microbial consortia combined with strengthening remediation strategies**

Haixuan Zhou<sup>1†</sup>, Xiurong Gao<sup>1,2†</sup>, Suhang Wang<sup>1,2</sup>, Youchi Zhang<sup>1</sup>, Frédéric Coulon<sup>3</sup>,  
Chao Cai<sup>1\*</sup>

<sup>1</sup> Key Lab of Urban Environment and Health, Institute of Urban Environment, Chinese Academy of Sciences, Xiamen 361021, China

<sup>2</sup> University of Chinese Academy of Sciences, Beijing 100049, China

<sup>3</sup> School of Water, Energy and Environment, Cranfield University, Cranfield MK43 0AL, UK

<sup>†</sup> These authors contributed equally to this work.

\* Correspondence should be addressed to: ccai@iue.ac.cn (Chao Cai)

## **Supporting Methodology**

**Chemicals:** Phenanthrene (PHE), pyrene (PYR), benzo (b) fluoranthene (BbF) and (BaP) benzo[a]pyrene (>97% purity), the surrogate standard mix contained naphthalene-d<sup>10</sup>, acenaphthene-d<sup>10</sup>, phenanthrene-d<sup>10</sup>, chrysene-d<sup>12</sup> and perylene-d<sup>12</sup>, a standard solution of 16 US EPA PAHs, were purchased from AccuStandard (CT, USA). N-hexane, methanol, acetone, and dichloromethane (all HPLC-spectrograde) were purchased from Tedia (TC, USA). Internal standard hexamethylbenzene (99% purity) was acquired from Dr. Ehrenstorfer (Augsburg, Germany). All the inorganic reagents were of analytical grade (Sinopharm Chemical Reagent Co., Ltd, Shanghai, China).

**Medium:** Minimal salt medium (MSM) contained (g/L) KH<sub>2</sub>PO<sub>4</sub> 3.4 g, Na<sub>2</sub>HPO<sub>4</sub> 19.6 g, (NH<sub>4</sub>)<sub>2</sub>SO<sub>4</sub> 1 g, MgSO<sub>4</sub> 97.4 mg and trace element, such as CuSO<sub>4</sub> 1 g, ZnSO<sub>4</sub> 1 g, FeSO<sub>4</sub> 1 g, CaCl<sub>2</sub> 1 g, H<sub>3</sub>BO<sub>4</sub> 1 g.

LB medium contained (g/L) Tryptone 10g, Yeast extract 5g, NaCl 10g.

LB solid medium was made by adding 20% agar.

**The determination of physical and chemical properties of soil** were according to the methods described in Lu (1999), and the specific procedures are as follows.

pH was measured in a suspension of soil/biochar with soil or biochar /water ratio of 1:2.5 (W/V). The content of soil organic matter was determined by potassium dichromate oxidation-volumetric method.

The contents of C, N, S, H and O elements in the soil/biochar were determined by Vario

Max elemental analyzer (VarioMax CNS, Germany).

The specific surface area and pore size of biochar were measured using 99.99% N<sub>2</sub> as adsorbent and at 1.036 bar saturated vapor pressure by automatic specific surface area, micropore and chemical adsorption instrument (ASAP 2020M+C).

**PAH analysis in CP soil:** A surrogate standard mix containing naphthalene-d<sup>10</sup>, acenaphthene-d<sup>10</sup>, phenanthrene-d<sup>10</sup>, chrysene-d<sup>12</sup> and perylene-d<sup>12</sup> (25 µL) at concentration of 400 µg/mL was added to the soil phase prior to extraction. Following the US EPA Method 3630C, the extracts were concentrated to 1 mL by rotary vacuum evaporation at 36°C. Then 15 mL of hexane were added and further concentrated to 1 mL. An internal standard hexamethylbenzene 15 µL (10 µg/mL in acetone) was added to the final solution added before analysis by GC-MS.

**Table S1 The total concentrations of 16 US EPA PAHs in CP soil**

| PAHs                    | Abbreviation | Ring number | Concentration(mg/kg) |
|-------------------------|--------------|-------------|----------------------|
| Naphthalene             | NAP          | 2           | $1.89 \pm 0.27$      |
| Acenaphthylene          | ANY          | 2           | $0.44 \pm 0.15$      |
| Acenaphthene            | ANA          | 3           | $2.74 \pm 0.37$      |
| Fluorene                | FLU          | 3           | $1.58 \pm 0.29$      |
| Phenanthrene            | PHE          | 3           | $8.99 \pm 1.73$      |
| Anthracene              | ANT          | 3           | $1.88 \pm 0.26$      |
| Fluoranthene            | FLT          | 4           | $21.91 \pm 3.87$     |
| Pyrene                  | PYR          | 4           | $22.46 \pm 2.61$     |
| Benzo(a)anthracene      | BaA          | 4           | $20.78 \pm 2.67$     |
| Chrysene                | CHR          | 4           | $23.52 \pm 3.35$     |
| Benzo(b)fluorene        | BbF          | 5           | $31.87 \pm 4.43$     |
| Benzo (k)fluorene       | BkF          | 5           | $14.91 \pm 2.05$     |
| Benzo(a)pyrene          | BaP          | 5           | $32.05 \pm 3.67$     |
| Indeno(1,2,3-c,d)pyrene | ICP          | 6           | $7.36 \pm 0.76$      |
| Dibenzo(a,h)anthracen   | DBA          | 6           | $36.03 \pm 3.11$     |
| Benzo(g,h,i)perylene    | BPE          | 6           | $27.07 \pm 2.03$     |
| Total PAHs              |              |             | $255.47 \pm 22.46$   |

**The physico-chemical properties of the biochar** were as follows: pH 10.0, total N 1.47 %, total C 47.6 %, total O 16.1 %, total H 2.25 %, specific surface area 2.98 m<sup>2</sup>/g.

**The physico-chemical properties of soil** were as follows: pH 8.6, total N 0.24 %, total C 16.6 %, total S 0.56 %, total Organic matter 8.20 %.

**Table S2 Biochemical properties of bacterial strains isolated from PAH contaminated soil**

| Item                         | ZL7                             | MI                                   | Q3                                             |
|------------------------------|---------------------------------|--------------------------------------|------------------------------------------------|
| Colony color                 | Pink                            | Light-yellow                         | Orange                                         |
| Colony surface               | Dry smooth                      | Dry smooth                           | Dry smooth                                     |
| Shape of cells               | Short rod                       | Short rod                            | Globular                                       |
| Gram staining <sup>a</sup>   | +                               | +                                    | +                                              |
| Spore staining <sup>a</sup>  | -                               | -                                    | -                                              |
| Degradable PAHs <sup>b</sup> | PHE, PYR, BaA, BbF, CHR and BkF | NAP, FLU, PHE, ANT, FLT, BbF and PYR | PHE, PYR, BaP, BbF, BaA, BkF, DBA, BPE and CHR |

<sup>a</sup> +, Positive; -, Negative.

<sup>b</sup> Naphthalene (NAP), fluorene (FLU), phenanthrene (PHE), anthracene (ANT), fluoranthene (FLT), pyrene (PYR), benzo[a]pyrene (BaP), benzo[a]anthracene (BaA), benzo[b]fluoranthene (BbF), benzo[k]fluoranthene (BkF), dibenzo[a,h]anthracene (DBA), benzo[g,h,i]perylene (BPE) and chrysene (CHR).

**Table S3 Total concentrations of 16 US EPA PAHs in test biochar**

| PAHs                    | Abbreviation | Ring number | Concentration (mg/kg) |
|-------------------------|--------------|-------------|-----------------------|
| Naphthalene             | NAP          | 2           | $0.08 \pm 0.003$      |
| Acenaphthylene          | ANY          | 2           | $0.15 \pm 0.007$      |
| Acenaphthene            | ANA          | 3           | $0.01 \pm 0.0001$     |
| Fluorene                | FLU          | 3           | $0.05 \pm 0.0002$     |
| Phenanthrene            | PHE          | 3           | $0.09 \pm 0$          |
| Anthracene              | ANT          | 3           | $0.17 \pm 0.02$       |
| Fluoranthene            | FLT          | 4           | $0.14 \pm 0$          |
| Pyrene                  | PYR          | 4           | $0.15 \pm 0.007$      |
| Benzo(a)anthracene      | BaA          | 4           | $0.28 \pm 0.009$      |
| Chrysene                | CHR          | 4           | $0.34 \pm 0.01$       |
| Benzo(b)fluorene        | BbF          | 5           | $0.24 \pm 0.007$      |
| Benzo (k)fluorene       | BkF          | 5           | $0.37 \pm 0.02$       |
| Benzo(a)pyrene          | BaP          | 5           | $0.31 \pm 0.002$      |
| Indeno(1,2,3-c,d)pyrene | ICP          | 6           | $0.47 \pm 0.02$       |
| Dibenzo(a,h)anthracen   | DBA          | 6           | $0.53 \pm 0.003$      |
| Benzo(g,h,i)perylene    | BPE          | 6           | $0.35 \pm 0.01$       |
| Total PAHs              |              |             | $3.72 \pm 0.04$       |

1

**Table S4 Residual PAH in CP soil with different treatments for 24 days**

2

| PAHs       | residual PAH (mg/kg) |              |             |              |             |              |              |             |             |            |             |            |            |
|------------|----------------------|--------------|-------------|--------------|-------------|--------------|--------------|-------------|-------------|------------|-------------|------------|------------|
|            | CK                   | T1           | T2          | T3           | T4          | T5           | T6           | T7          | T8          | T9         | T10         | T11        | T12        |
| NAP        | 1.09±0.35            | 1.42±0.21    | 1.48±0.25   | 0.73±0.16    | 1.32±0.29   | 0.47±0.16    | 0.72±0.25    | 1.30±0.45   | 1.86±0.64   | 1.04±0.02  | 1.06±0.95   | 0.79±0.29  | 1.05±0.49  |
| ANY        | 0.46±0.12            | 0.36±0.06    | 0.46±0.08   | 0.34±0.07    | 0.36±0.06   | 0.28±0.07    | 0.43±0.05    | 0.34±0.03   | 0.65±0.16   | 0.41±0.14  | 0.35±0.30   | 0.29±0.29  | 0.23±0.05  |
| ANA        | 2.60±0.54            | 2.47±0.68    | 2.49±0.33   | 1.79±0.36    | 2.19±0.52   | 1.26±0.52    | 2.31±0.38    | 1.87±0.15   | 3.16±1.43   | 2.29±0.32  | 1.90±0.93   | 1.50±0.17  | 1.33±0.20  |
| FLU        | 1.91±0.34            | 1.74±0.52    | 1.84±0.31   | 1.63±0.15    | 1.68±0.35   | 1.15±0.28    | 1.70±0.12    | 1.38±0.10   | 2.56±0.32   | 1.72±0.23  | 1.32±0.98   | 1.12±0.11  | 0.99±0.18  |
| PHE        | 8.08±0.93            | 6.83±1.48    | 5.66±0.92   | 6.92±1.08    | 4.91±0.76   | 4.43±1.15    | 6.29±1.40    | 5.27±0.62   | 5.64±0.39   | 4.87±1.31  | 3.70±0.59   | 4.55±0.50  | 3.27±0.31  |
| ANT        | 1.85±0.30            | 1.44±0.43    | 1.11±0.17   | 1.48±0.28    | 1.10±0.18   | 0.96±0.27    | 1.28±0.16    | 1.14±0.10   | 1.07±0.15   | 1.13±0.25  | 0.74±0.11   | 0.91±0.07  | 0.65±0.10  |
| FLT        | 18.02±2.26           | 12.71±1.86   | 14.76±1.86  | 13.02±1.82   | 13.27±0.64  | 9.86±1.81    | 12.08±1.92   | 10.72±0.93  | 23.10±2.47  | 13.74±2.49 | 11.17±2.49  | 9.00±0.67  | 7.45±1.62  |
| PYR        | 21.19±1.49           | 18.08±1.83   | 13.15±1.45  | 14.99±1.76   | 11.96±0.09  | 11.08±1.79   | 15.25±2.66   | 15.10±2.25  | 13.60±2.10  | 10.83±3.07 | 9.62±1.90   | 12.49±1.29 | 8.50±1.37  |
| BaA        | 14.42±2.11           | 11.47±0.99   | 9.17±0.60   | 10.89±1.70   | 8.28±0.47   | 8.28±0.88    | 9.38±1.41    | 8.80±0.72   | 10.14±0.99  | 6.57±0.72  | 5.73±0.88   | 7.45±0.58  | 4.58±0.59  |
| CHR        | 17.36±2.00           | 13.42±1.89   | 10.68±0.91  | 12.56±1.95   | 9.48±0.16   | 9.96±0.88    | 11.83±1.40   | 10.93±0.68  | 12.17±1.59  | 6.99±2.91  | 7.26±0.82   | 9.06±0.63  | 3.93±2.13  |
| BbF        | 19.56±2.92           | 15.26±1.80   | 12.98±0.47  | 14.44±2.25   | 11.95±0.84  | 11.44±1.12   | 13.18±1.12   | 11.43±0.08  | 13.18±0.75  | 8.91±1.02  | 7.53±1.82   | 9.27±0.68  | 6.62±0.80  |
| BkF        | 7.23±0.92            | 5.48±0.30    | 4.76±0.06   | 5.27±0.64    | 4.27±0.38   | 4.20±0.43    | 4.87±0.67    | 5.26±2.22   | 4.89±0.26   | 3.99±1.25  | 4.40±1.26   | 5.30±1.43  | 3.68±1.02  |
| BaP        | 22.57±3.43           | 17.16±1.43   | 13.69±0.80  | 13.75±1.66   | 13.74±1.57  | 11.58±0.61   | 13.82±0.78   | 11.00±1.68  | 12.25±0.37  | 8.37±1.31  | 7.76±0.84   | 9.36±0.60  | 7.41±0.73  |
| ICP        | 23.36±3.72           | 12.50±2.80   | 14.49±0.65  | 12.12±3.14   | 16.28±2.15  | 13.15±2.35   | 15.57±0.71   | 6.36±1.68   | 10.86±1.32  | 5.79±2.34  | 4.87±1.39   | 6.56±1.65  | 6.99±1.07  |
| DBA        | 25.35±2.05           | 16.94±1.58   | 16.33±0.49  | 16.02±2.55   | 16.30±1.24  | 13.85±2.35   | 16.55±0.30   | 13.34±0.47  | 12.64±1.06  | 10.07±1.08 | 5.03±1.72   | 7.59±1.53  | 7.55±0.68  |
| BPE        | 2.24±0.33            | 1.41±1.58    | 1.58±0.38   | 1.68±0.52    | 1.64±0.15   | 1.45±0.43    | 1.67±0.28    | 1.16±0.25   | 1.30±0.08   | 0.85±0.06  | 0.87±0.32   | 0.79±0.03  | 0.78±0.28  |
| Total PAHs | 187.29±7.14          | 138.70±15.48 | 124.61±4.73 | 127.60±18.17 | 118.74±4.64 | 103.40±10.74 | 126.93±11.47 | 105.39±6.80 | 129.13±7.33 | 87.59±9.42 | 73.33±13.03 | 86.01±1.36 | 65.01±4.71 |

3

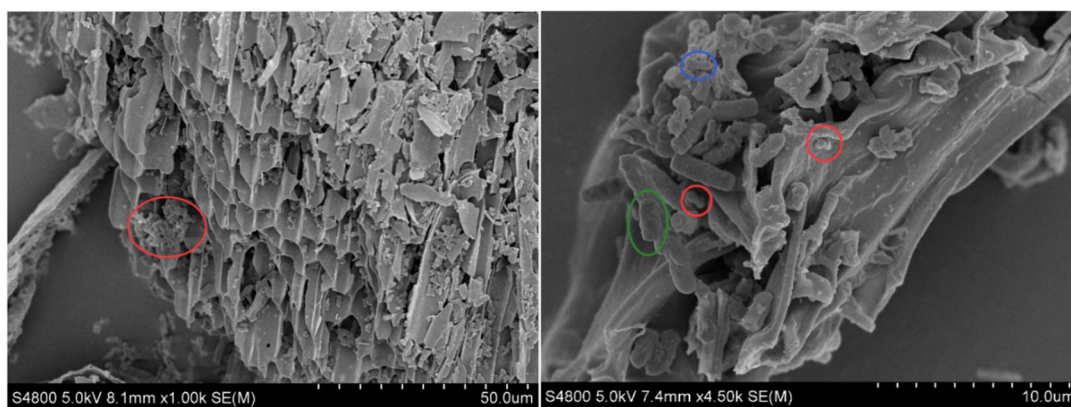

**Figure S1 SEM images of biochar immobilized microbial composites**



## **References**

Lu, R.K. Soil argrochemistry analysis protocols. Beijing: China Agriculture Science Press: 1999.
